# Supplementary material
Source: publisher figshare collection journal article supplement (https://gsajournals.figshare.com/ndownloader/files/21805581)
Supplement: Supplementary file 1 [file 21805581]

**Supplementary Table S4**. Wilcoxon-Mann-Whitney rank sum test with continuity correction.

* Gene-based statistics, only genes with more than 10 counts were used. ** Gene-based statistics, genes without introns or with introns shorter than 10 bp were excluded.

| Species | Value per 100Kb | Effect size | Wilcoxon test  (ARMS/ CENTER) | p-value | 95 percent CI | Difference |
| --- | --- | --- | --- | --- | --- | --- |
| *C. elegans* | Gene count | 0.4364104 | 93950 | 2.921e-15 | -4.999951 -2.999963 | -3.999985 |
| *C. remanei* | Gene count | 0.72167 | 116470 | < 2.2e-16 | -6.999954 -5.000006 | -5.999928 |
| *C. elegans* | Gene Fraction | 0.03339982 | 134600 | 0.4892 | -0.00924946 0.01882278 | 0.004950743 |
| *C. remanei* | Gene Fraction | 0.433228 | 152960 | 1.838e-11 | -0.06908799 -0.03785758 | -0.05328734 |
| *C. elegans* | Exon Fraction | 0.8912415 | 68536 | < 2.2e-16 | -0.07961461 -0.06031864 | -0.06993814 |
| *C. remanei* | Exon Fraction | 1.031699 | 90491 | < 2.2e-16 | -0.10524316 -0.08477255 | -0.09503794 |
| *C. elegans* | Intron Fraction | 0.6829095 | 177730 | < 2.2e-16 | 0.05398162 0.08075533 | 0.06728625 |
| *C. remanei* | Intron Fraction | 0.3245661 | 227220 | 1.004e-06 | 0.01623107 0.03793183 | 0.02698887 |
| *C. elegans* | Repetitive | 1.577321 | 232780 | < 2.2e-16 | 0.1519187 0.1783479 | 0.1650443 |
| *C. remanei* | Repetitive | 1.439287 | 332810 | < 2.2e-16 | 0.1682565 0.1930108 | 0.1807309 |
| *C. elegans* | GC-content | 0.2979627 | 158380 | 1.135e-08 | 0.003266596 0.006585091 | 0.004945911 |
| *C. remanei* | GC-content | 0.1440296 | 220070 | 0.0001618 | 0.001235194 0.003847047 | 0.002547137 |
| *C. elegans* | Hi-C | 1.45915 | 39418 | < 2.2e-16 | -6.999977 -5.000017 | -6.000043 |
| *C. remanei* | Hi-C | 1.737614 | 45396 | < 2.2e-16 | -14.00004 -12.99999 | -13.00006 |
| *C. elegans* | RNA-seq ,* L1 stage | 0.06342101 | 9796800 | < 2.2e-16 | -3.583018 -2.081627 | -2.793441 |
| *C. remanei* | RNA_seq, * L1 stage | 0.03937415 | 29629000 | 2.892e-14 | -0.7855230 -0.4274027 | -0.5992334 |
| *C. elegans* | Total intron length ** | 0.200936 | 53932000 | < 2.2e-16 | 172 224 | 197.9999 |
| *C. remanei* | Total intron length ** | 0.2838546 | 82764000 | < 2.2e-16 | 86.00003 118.99999 | 101.0001 |
